# Supplementary material for: Association of Newly Developed Right Bundle Branch Block with Graft Rejection Following Heart Transplantation
Source: PubMed Central journal article supplement — Yonsei Med J. 2019 Apr 19;60(5):423–8. doi: 10.3349/ymj.2019.60.5.423 (PMC6479131; doi:10.3349/ymj.2019.60.5.423), 2019-04-19
Supplement: ymj-60-423-s001.pdf [file ymj-60-423-s001.pdf]

**Supplementary Table 1.** PR Interval and QRS Duration at 1 Year according to Change in Graft Rejection Following HT

|                   | <b>The change of graft rejection from 1 month to 1 year following HT</b> |                          |                        |                        | <b><i>p</i> value</b> |
|-------------------|--------------------------------------------------------------------------|--------------------------|------------------------|------------------------|-----------------------|
|                   | <b>No change in GR</b>                                                   | <b>No evidence of GR</b> | <b>New onset of GR</b> | <b>Resolving of GR</b> |                       |
| PR interval (ms)  | 161.5±21.8                                                               | 146.4±22.9               | 161.5±12.2             | 146.0±14.8             | 0.054                 |
| QRS duration (ms) | 98.5±12.0                                                                | 100.8±14.3               | 101.1±15.9             | 98.6±18.1              | 0.962                 |

GR, graft rejection; HT, heart transplantation.  
Values are presented as n (%).
